# Supplementary material for: Punicic acid ameliorates obesity-related hyperlipidemia and fatty liver in mice via regulation of intestinal flora and lipopolysaccharide-related signaling pathways
Source: Royal Society of Chemistry journal article supplement (doi:10.1039/d4fo00502c), 2024-01-01
Supplement: d4fo00502c1.pdf [file d4fo00502c1.pdf]

## Supplementary materials

**Table 1.** Primer sequences

| Target gene          | Primer sequences              | Orientation |
|----------------------|-------------------------------|-------------|
| Mouse $\beta$ -actin | 5'-TGTCCACCTTCCAGCAGATGT-3'   | Forward     |
|                      | 5'-AGCTCAGTAACAGTCCGCCTAGA-3' | Reverse     |
| Mouse Lpl            | 5'-TTGCCCTAAGGACCCCTGAA-3'    | Forward     |
|                      | 5'-TTGAAGTGGCAGTTAGACACAG-3'  | Reverse     |
| Mouse Fas            | 5'-CATGCACAGAAGGGAAGGAGT-3'   | Forward     |
|                      | 5'-ACACAGTGTTCACAGCCAGAA-3'   | Reverse     |
| Mouse Acaca          | 5'-GATGAACCATCTCCGTTGGC-3'    | Forward     |
|                      | 5'-GACCCAATTATGAATCGGGAGTG-3' | Reverse     |
| Mouse Hmger          | 5'-AGCTTGCCCGAATTGTATGTG-3'   | Forward     |
|                      | 5'-TCTGTTGTGAACCATGTGACTTC-3' | Reverse     |

**Table 2.** Antibodies and Reagents

| Reagent or resource                                          | Source               | Identifier  |
|--------------------------------------------------------------|----------------------|-------------|
| Antibodies                                                   |                      |             |
| Anti-ZO-1, dilution: 1/1000 for WB                           | Affinity Biosciences | Cat#AF5145  |
| Anti-Claudin-1, dilution: 1/1000 for WB                      | Affinity Biosciences | Cat#DF0133  |
| Anti-Occludin, dilution: 1/2000 for WB                       | Affinity Biosciences | Cat#D7504   |
| Anti-anti-TLR4, dilution: 1/1000 for WB                      | Affinity Biosciences | Cat#AF7017  |
| Anti-MyD88, dilution: 1/1000 for WB                          | Affinity Biosciences | Cat#DF6162  |
| Anti-NF- $\kappa$ B p65, dilution: 1/1000 for WB             | Affinity Biosciences | Cat#AF5006  |
| Anti-phospho-NF- $\kappa$ B p65, dilution: 1/1000 for WB     | Affinity Biosciences | Cat#AF2006  |
| Anti-I $\kappa$ B $\alpha$ , dilution: 1/1000 for WB         | Affinity Biosciences | Cat#AF7776  |
| Anti-phospho-I $\kappa$ B $\alpha$ , dilution: 1/1000 for WB | Affinity Biosciences | Cat#AF2002  |
| Anti-IL-6, dilution: 1/1000 for WB                           | Affinity Biosciences | Cat#DF6087  |
| Anti-IL-1 $\beta$ , dilution: 1/1000 for WB                  | Affinity Biosciences | Cat#AF5103  |
| Anti-IL-10, dilution: 1/1000 for WB                          | Affinity Biosciences | Cat#DF6894  |
| Anti-PPAR $\gamma$ , dilution: 1/1000 for WB                 | Affinity Biosciences | Cat#AF6284  |
| Anti-FASN, dilution: 1/1000 for WB                           | Affinity Biosciences | Cat#DF6106  |
| Anti-HMGCR, dilution: 1/1000 for WB                          | Affinity Biosciences | Cat#DF6518  |
| Anti-DGAT1, dilution: 1/2000 for WB                          | Affinity Biosciences | Cat#DF13368 |
| Anti-SCD1, dilution: 1/1000 for WB                           | Affinity Biosciences | Cat#DF13253 |
| Anti-SREBP1c, dilution: 1/1000 for WB                        | Affinity Biosciences | Cat#AF4728  |
| Anti-PPAR $\alpha$ , dilution: 1/4000 for WB                 | Affinity Biosciences | Cat#AF5301  |
| Anti-CPT1 $\alpha$ , dilution: 1/1000 for WB                 | Affinity Biosciences | Cat#DF12004 |
| Anti-ACOX1, dilution: 1/1000 for WB                          | Affinity Biosciences | Cat#DF12046 |
| Anti-FGF21, dilution: 1/2000 for WB                          | Affinity Biosciences | Cat#DF8974  |
| Anti-IL-22, dilution: 1/2000 for WB                          | Affinity Biosciences | Cat#DF8343  |
| Anti-NFIL3, dilution: 1/1000 for WB                          | Affinity Biosciences | Cat#DF3303  |
| Anti-STAT3, dilution: 1/1000 for WB                          | Affinity Biosciences | Cat#AF6294  |
| Anti-phospho-STAT3, dilution: 1/1000 for WB                  | Affinity Biosciences | Cat#AF3293  |

|                                                         |                              |            |
|---------------------------------------------------------|------------------------------|------------|
| Anti-ANGPTL4, dilution: 1/1000 for WB                   | Affinity Biosciences         | Cat#DF6751 |
| Anti- $\beta$ -actin, dilution: 1/5000 for WB           | Zen Bioscience               | Cat#R23613 |
| Goat anti-Rabbit IgG (H+L)-HRP, dilution:1/10000 for WB | HuaAn Biotechnology Co., Ltd | Cat#HA1001 |

---

Chemicals and reagents

---

|                                                                                     |                          |               |
|-------------------------------------------------------------------------------------|--------------------------|---------------|
| RIPA lysis buffer                                                                   | Beyotime Biotechnology   | Cat#P0013B    |
| protease and phosphatase inhibitor                                                  | Beyotime Biotechnology   | Cat#P1045     |
| BCA protein concentration assay kit                                                 | Beyotime Biotechnology   | Cat#EC0001    |
| Triglyceride (TG) assay kit                                                         | Jiancheng Bioengineering | Cat#A110-1-1  |
| Total cholesterol (TC) assay kit                                                    | Jiancheng Bioengineering | Cat#A111-1-1  |
| Low-density lipoprotein cholesterol (LDL-C) assay kit                               | Jiancheng Bioengineering | Cat#A113-1-1  |
| High-density lipoprotein cholesterol (HDL-C) assay kit                              | Jiancheng Bioengineering | Cat#A112-1-1  |
| Non-esterified fatty acid (NEFA) assay kit                                          | Jiancheng Bioengineering | Cat#A042-2-1  |
| Alanine transaminase (ALT) assay kit                                                | Jiancheng Bioengineering | Cat#C009-3-1  |
| Aspartate aminotransferase (AST) assay kit                                          | Jiancheng Bioengineering | Cat#C010-3-1  |
| Total bile acid (TBA) assay kit                                                     | Jiancheng Bioengineering | Cat#E003-2-1  |
| Total antioxidant capacity (T-AOC) assay kit                                        | Jiancheng Bioengineering | Cat#A015-2-1  |
| Reduced glutathione (GSH) assay kit                                                 | Jiancheng Bioengineering | Cat#A006-2-1  |
| Superoxide dismutase (SOD) assay kit                                                | Jiancheng Bioengineering | Cat#A001-3    |
| Malondialdehyde (MDA) assay kit                                                     | Jiancheng Bioengineering | Cat#A003-1-2  |
| Myeloperoxidase (MPO) assay kit                                                     | Jiancheng Bioengineering | Cat#A044-1-1  |
| Mouse interleukin 6 (IL-6) ELISA kit                                                | Ruixin Biotechnology     | Cat#RX202049M |
| Mouse interleukin-10 (IL-10) ELISA kit                                              | Ruixin Biotechnology     | Cat#RX203075M |
| Mouse interleukin-1 $\beta$ (IL-1 $\beta$ ) ELISA kit                               | Jianglai Biotechnology   | Cat#JL18442   |
| RNAiso Plus                                                                         | Takara Bio               | Cat#9108      |
| PrimeScript <sup>™</sup> RT reagent kit with gDNA Eraser                            | Takara Bio               | Cat#RR047A    |
| TB Green <sup>®</sup> <i>Premix Ex Taq</i> <sup>™</sup> (Tli RNaseH Plus), ROX plus | Takara Bio               | Cat#RR42LR    |
| ECL Plus chemiluminescence reagent kit                                              | Yeasen Biotech           | Cat#36222ES60 |

---

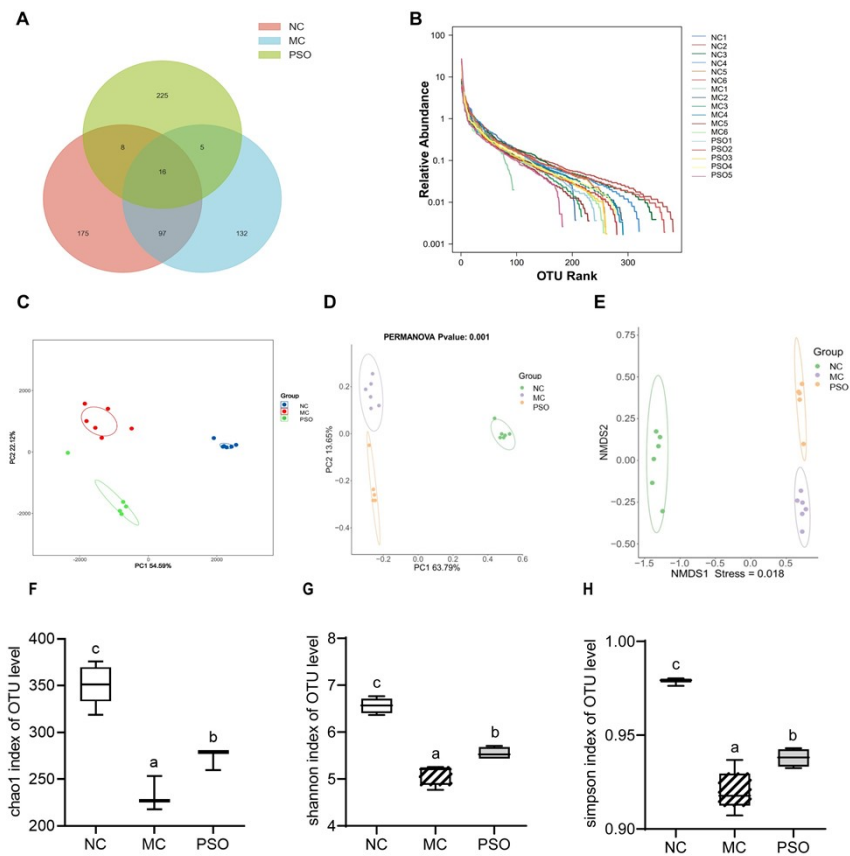

**Fig. 1** Effects of PSO on species richness and overall profile of the intestinal microbiome in HFHFD-fed mice. (A) OTU numbers of intestinal bacteria. (B) OTU rank abundance. (C–E) Plots of PCA, UniFrac distance-based PCoA and nonmetric multidimensional scaling (NMDS). (F–H) Chao1 index, Shannon and Simpson index, respectively. Data are shown as means  $\pm$  SD. Means with distinct lowercase letter are significantly different ( $P < 0.05$ ).
